# Supplementary material for: Polyurethane-based Eu(iii) luminescent foam as a sensor for recognizing Cu2+ in water
Source: Royal Society of Chemistry journal article supplement (doi:10.1039/c3ay41365a), 2013-01-01
Supplement: c3ay41365a.pdf [file c3ay41365a.pdf]

***Supporting information for***

Polyurethane-based Eu(III) luminescent foam as sensor for recognizing  
 $\text{Cu}^{2+}$  in water

Zhan Zhou <sup>b</sup>, Qianming Wang <sup>\*a,b</sup>, Zhi Zeng <sup>b</sup>, Liting Yang <sup>b</sup>, Xiaoping Ding <sup>b</sup>, Ni Lin  
<sup>b</sup>, Zongsheng Cheng <sup>b</sup>

<sup>a</sup> *Key Laboratory of Theoretical Chemistry of Environment, Ministry of Education,  
School of Chemistry and Environment, South China Normal University, Guangzhou  
510006, P. R. China*

<sup>b</sup> *School of Chemistry and Environment, South China Normal University, Guangzhou  
510006, P. R. China*

\* To whom the correspondence should be addressed. E-mail: [qmwang@scnu.edu.cn](mailto:qmwang@scnu.edu.cn)  
Tel: 86-20-39310258; Fax: 86-20-39310187

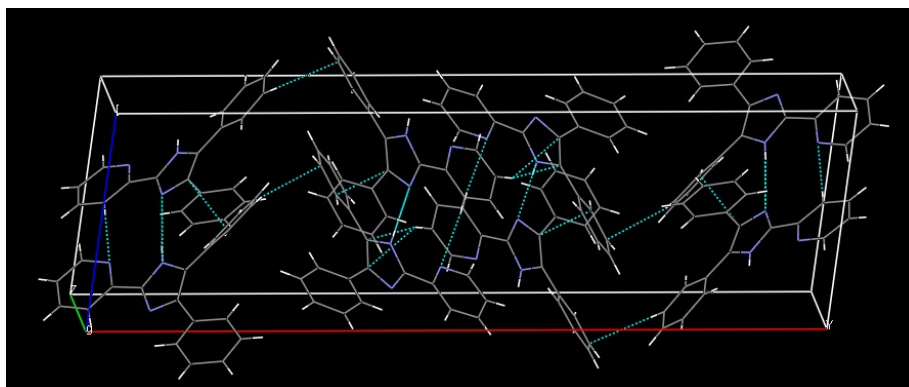

Figure S1. The crystal structure of ligand (**L**).

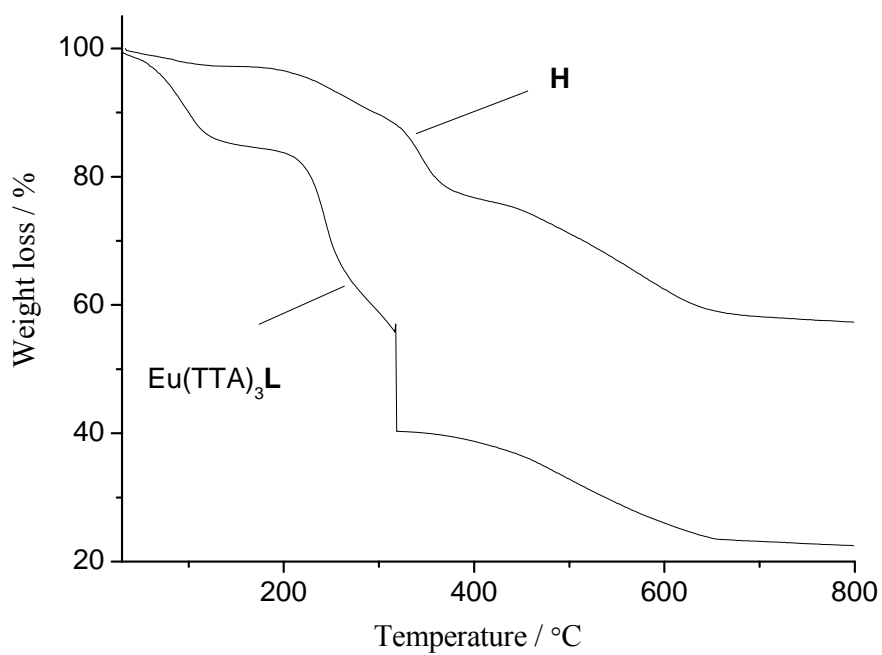

Figure S2. Thermogravimetric analysis traces of  $\text{Eu}(\text{TTA})_3\text{L}$  and **H**.

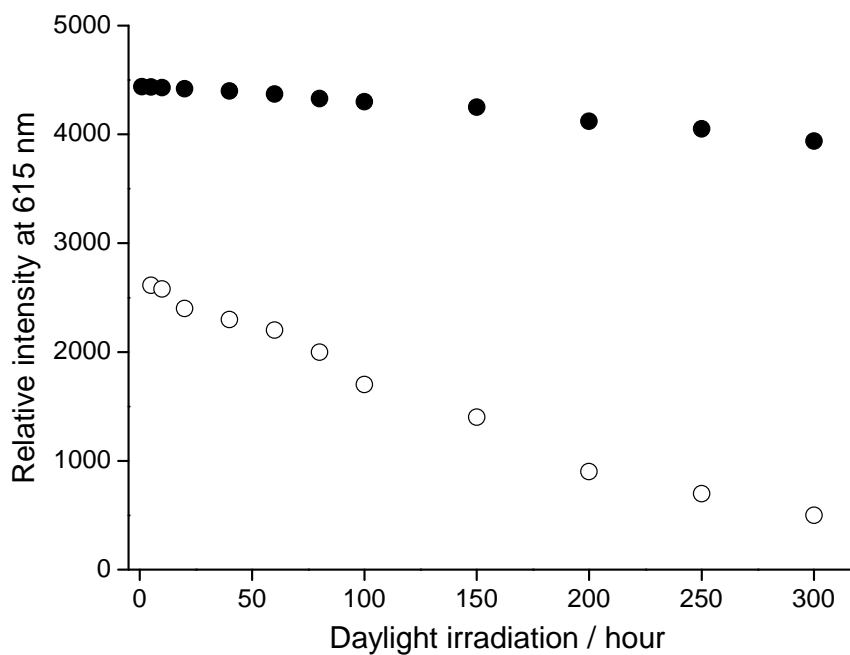

Figure S3. Emission intensity of **H** (full circle) and  $\text{Eu}(\text{TTA})_3\text{L}$  (empty circle) at 615 nm under daylight-irradiation.

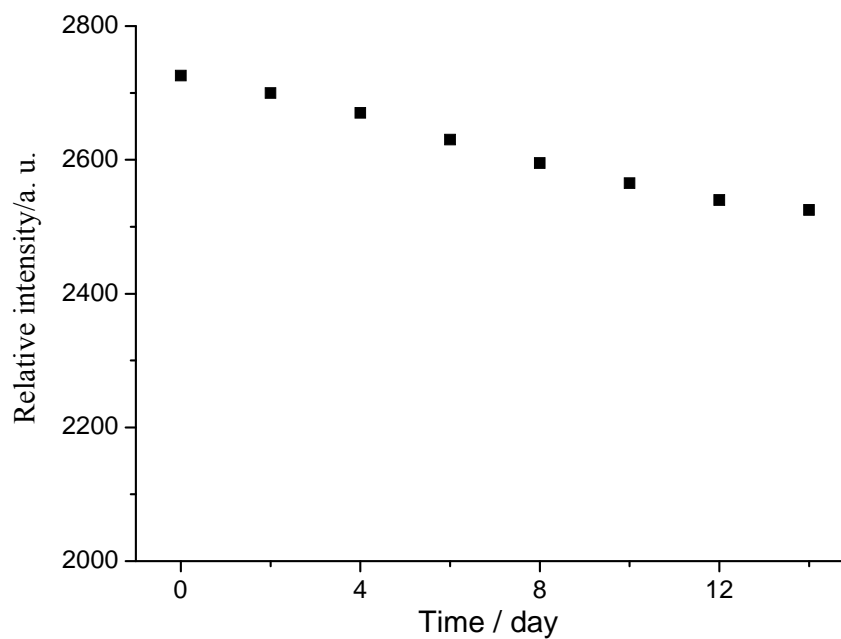

Figure S4. Dependence of peak intensity of  ${}^5\text{D}_0 \rightarrow {}^7\text{F}_2$  transition of  $\text{Eu-PUF}$  on the extraction time in water.

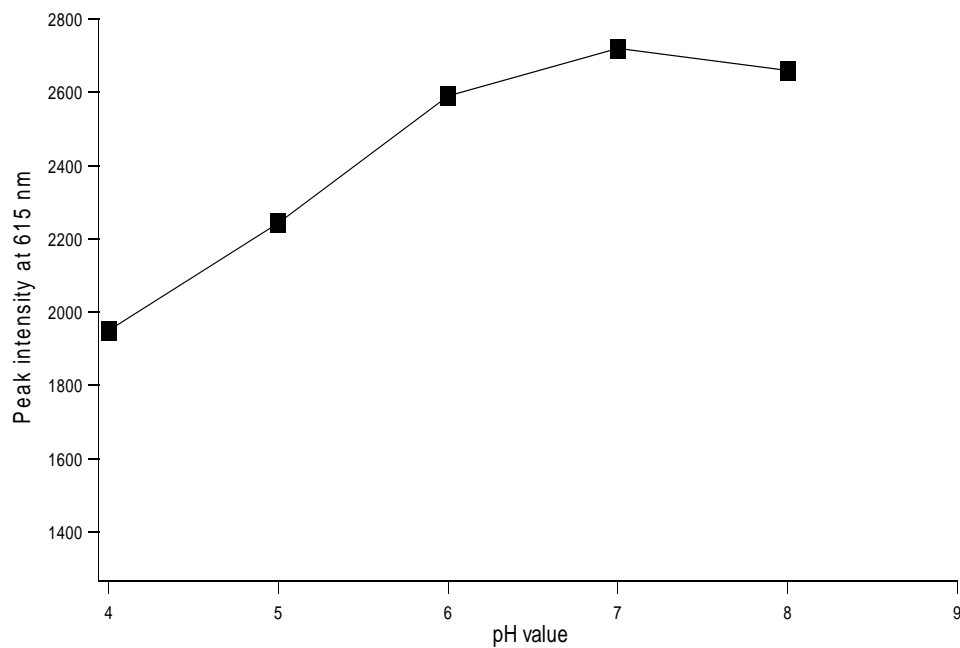

Figure S5 Emission peak intensities of Eu-PUF at different pH values.

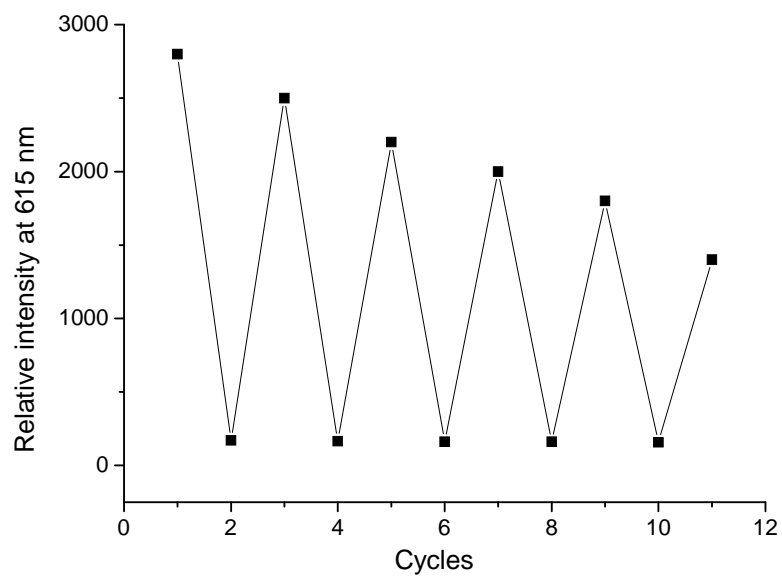

Figure S6. Graph of the fluorescence peak intensity of **H** at 615 nm versus alternate dipping into  $5 \times 10^{-4}$  M of copper ions in water.

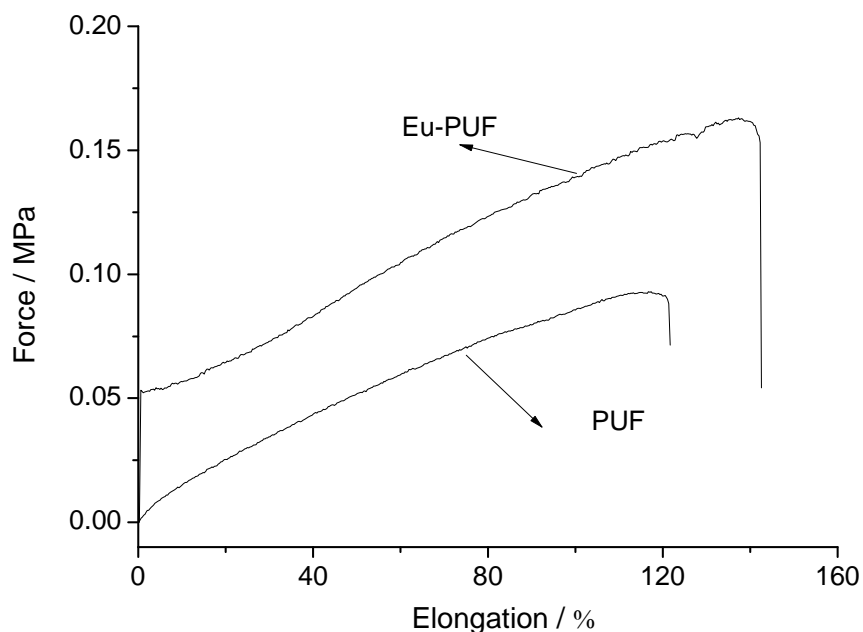

Figure S7. The tensile curves of Eu-PUF and pure PUF.

Table S1 Bond lengths [Å] for ligand (L)

|                  |                  |                  |
|------------------|------------------|------------------|
| C9 C10 1.382(5)  | C15 N1 1.352     | C31 C32 1.376(5) |
| C9 C14 1.397(5)  | C15 C16 1.458    | C31 H31 0.9300   |
| C9 C8 1.461(5)   | N5 C20 1.338     | C24 C25 1.385(5) |
| C8 C7 1.375(5)   | N5 C16 1.344     | C24 H24 0.9300   |
| C8 N1 1.382(4)   | C16 C17 1.380    | C22 H22 0.9300   |
| C7 N2 1.391(4)   | C18 C19 1.374    | C34 C33 1.366(5) |
| C7 C2 1.480(5)   | C18 C17 1.380    | C34 H34 0.9300   |
| C2 C1 1.381(5)   | C18 H18 0.9300   | C25 H25 0.9300   |
| C2 C3 1.384(5)   | C17 H17 0.9300   | C33 C32 1.372(5) |
| C11 C12 1.376(6) | C19 C20 1.359(6) | C33 H33 0.9300   |
| C11 C10 1.378(5) | C19 H19 0.9300   | C32 H32 0.9300   |
| C11 H11 0.9300   | C20 H20 0.9300   | C36 N3 1.319(4)  |
| C1 C6 1.385(5)   | C26 C27 1.381(5) | C36 N4 1.356(4)  |
| C1 H1 0.9300     | C26 C25 1.386(5) | C36 C37 1.459(5) |
| C3 C4 1.383(5)   | C26 C28 1.475(5) | C37 N6 1.343(4)  |
| C3 H3 0.9300     | C29 C28 1.373(5) | C37 C38 1.378(5) |
| C10 H10 0.9300   | C29 N4 1.382(4)  | N6 C41 1.343(5)  |
| C14 C13 1.370(6) | C29 C30 1.465(5) | C38 C39 1.384(5) |
| C14 H14 0.9300   | C30 C35 1.387(5) | C38 H38 0.9300   |
| C12 C13 1.371(6) | C30 C31 1.389(5) | C39 C40 1.354(6) |
| C12 H12 0.9300   | C28 N3 1.394(4)  | C39 H39 0.9300   |
| C13 H13 0.9300   | C27 C22 1.383(5) | C40 C41 1.359(5) |

|                |                  |                |
|----------------|------------------|----------------|
| C4 C5 1.379(6) | C27 H27 0.9300   | C40 H40 0.9300 |
| C4 H4 0.9300   | C35 C34 1.382(5) | C41 H41 0.9300 |
| C6 C5 1.366(6) | C35 H35 0.9300   | N1 H1A 0.8600  |
| C6 H6 0.9300   | C23 C24 1.364(5) | N4 H4A 0.8600  |
| C5 H5 0.9300   | C23 C22 1.372(5) |                |
| C15 N2 1.322   | C23 H23 0.9300   |                |

Table S2 Angles [deg] for ligand (L)

|                      |                      |                      |
|----------------------|----------------------|----------------------|
| C10 C9 C14 118.4(4)  | N1 C15 C16 122.8(4)  | C23 C22 C27 119.7(4) |
| C10 C9 C8 121.3(4)   | C20 N5 C16 116.7(4)  | C23 C22 H22 120.2    |
| C14 C9 C8 120.3(4)   | N5 C16 C17 123.6(4)  | C27 C22 H22 120.2    |
| C7 C8 N1 104.9(4)    | N5 C16 C15 116.3(4)  | C33 C34 C35 120.4(4) |
| C7 C8 C9 134.4(4)    | C17 C16 C15 120.0(4) | C33 C34 H34 119.8    |
| N1 C8 C9 120.6(4)    | C19 C18 C17 118.8(5) | C35 C34 H34 119.8    |
| C8 C7 N2 110.2(3)    | C19 C18 H18 120.6    | C24 C25 C26 120.9(4) |
| C8 C7 C2 130.9(4)    | C17 C18 H18 120.6    | C24 C25 H25 119.5    |
| N2 C7 C2 118.8(4)    | C16 C17 C18 117.9(4) | C26 C25 H25 119.5    |
| C1 C2 C3 118.6(4)    | C16 C17 H17 121.0    | C34 C33 C32 119.9(4) |
| C1 C2 C7 119.6(4)    | C18 C17 H17 121.0    | C34 C33 H33 120.0    |
| C3 C2 C7 121.8(4)    | C20 C19 C18 119.6(5) | C32 C33 H33 120.0    |
| C12 C11 C10 120.1(5) | C20 C19 H19 120.2    | C33 C32 C31 120.1(4) |
| C12 C11 H11 119.9    | C18 C19 H19 120.2    | C33 C32 H32 120.0    |
| C10 C11 H11 119.9    | N5 C20 C19 123.3(5)  | C31 C32 H32 120.0    |
| C2 C1 C6 121.1(5)    | N5 C20 H20 118.4     | N3 C36 N4 111.9(3)   |
| C2 C1 H1 119.5       | C19 C20 H20 118.4    | N3 C36 C37 124.1(4)  |
| C6 C1 H1 119.5       | C27 C26 C25 118.4(4) | N4 C36 C37 123.7(4)  |
| C4 C3 C2 120.7(5)    | C27 C26 C28 119.2(4) | N6 C37 C38 123.1(4)  |
| C4 C3 H3 119.7       | C25 C26 C28 122.4(4) | N6 C37 C36 116.0(4)  |
| C2 C3 H3 119.7       | C28 C29 N4 105.6(3)  | C38 C37 C36 120.8(4) |
| C11 C10 C9 120.8(4)  | C28 C29 C30 133.7(4) | C37 N6 C41 116.5(4)  |
| C11 C10 H10 119.6    | N4 C29 C30 120.5(4)  | C37 C38 C39 118.1(4) |
| C9 C10 H10 119.6     | C35 C30 C31 118.1(4) | C37 C38 H38 120.9    |
| C13 C14 C9 120.1(5)  | C35 C30 C29 120.8(4) | C39 C38 H38 120.9    |
| C13 C14 H14 119.9    | C31 C30 C29 121.1(4) | C40 C39 C38 119.4(4) |
| C9 C14 H14 119.9     | C29 C28 N3 109.8(3)  | C40 C39 H39 120.3    |
| C13 C12 C11 119.5(5) | C29 C28 C26 132.2(4) | C38 C39 H39 120.3    |
| C13 C12 H12 120.2    | N3 C28 C26 117.9(4)  | C39 C40 C41 119.1(5) |
| C11 C12 H12 120.2    | C26 C27 C22 120.8(4) | C39 C40 H40 120.5    |

|                      |                      |                     |
|----------------------|----------------------|---------------------|
| C14 C13 C12 120.9(5) | C26 C27 H27 119.6    | C41 C40 H40 120.5   |
| C14 C13 H13 119.5    | C22 C27 H27 119.6    | N6 C41 C40 123.8(5) |
| C12 C13 H13 119.5    | C34 C35 C30 120.5(4) | N6 C41 H41 118.1    |
| C5 C4 C3 119.5(5)    | C34 C35 H35 119.7    | C40 C41 H41 118.1   |
| C5 C4 H4 120.2       | C30 C35 H35 119.7    | C15 N1 C8 108.1(3)  |
| C3 C4 H4 120.2       | C24 C23 C22 120.7(4) | C15 N1 H1A 126.0    |
| C5 C6 C1 119.4(5)    | C24 C23 H23 119.6    | C8 N1 H1A 126.0     |
| C5 C6 H6 120.3       | C22 C23 H23 119.6    | C36 N4 C29 107.4(3) |
| C1 C6 H6 120.3       | C32 C31 C30 120.9(4) | C36 N4 H4A 126.3    |
| C6 C5 C4 120.7(5)    | C32 C31 H31 119.5    | C29 N4 H4A 126.3    |
| C6 C5 H5 119.6       | C30 C31 H31 119.5    | C15 N2 C7 105.2(3)  |
| C4 C5 H5 119.6       | C23 C24 C25 119.5(4) | C36 N3 C28 105.2(3) |
| N2 C15 N1 111.6(4)   | C23 C24 H24 120.2    |                     |
| N2 C15 C16 125.4(4)  | C25 C24 H24 120.2    |                     |

Table S3 Hydrogen bonding interactions of ligand (L)

| Hydrogen bonds with<br>Donor --- H...Acceptor | d(H...A) < R(H) + R(A) - 0.12 Ang., D-H...A > 100.0 Deg. |       |        |         |
|-----------------------------------------------|----------------------------------------------------------|-------|--------|---------|
|                                               | D-H                                                      | H...A | D...A  | D-H...A |
| N(1)---H(1A)...N(2)                           | 0.86                                                     | 2.16  | 2.9721 | 156     |
| N(4)---H(4A)...N(3)                           | 0.86                                                     | 2.11  | 2.9216 | 158     |
| C(21)---H(21)...N(1)                          | 0.93                                                     | 2.48  | 2.8135 | 101     |
| C(27)---H(27)...N(3)                          | 0.93                                                     | 2.54  | 2.8504 | 100     |
| C(42)---H(42)...N(4)                          | 0.93                                                     | 2.50  | 2.8307 | 101     |

Table S4 Determination of Cu<sup>2+</sup> in real water samples

| Sample | Added (μM) | Mean found (μM) | RSD (%) | Recovery (%) |
|--------|------------|-----------------|---------|--------------|
| 1      | 0          | Not detectable  |         |              |
|        | 5          | 5.56            | 1.19    | 99.2         |
| 2      | 0          | 11.61           |         |              |
|        | 5          | 16.69           | 0.99    | 100.5        |

Sample 1: tap water; sample 2: river water; RSD (%): relative standard deviation of three determinations.
